1     **Reconstitution of the host holobiont acutely increases bone growth of the gnotobiotic rat**

2     Czernik, PJ<sup>1,3</sup>, Golonka, RM<sup>1,2,3</sup>, Chakraborty, S<sup>1,2,3</sup>, Yeoh, BS<sup>1,2,3</sup>, Saha, P<sup>1,2,3</sup>, Mell, B<sup>1,2,3</sup>, Tian,  
3     Y<sup>5</sup>, Patterson, AD<sup>5</sup>, Joe, B<sup>1,2,3</sup>, Vijay-Kumar, M<sup>1,2,3\*</sup>, Lecka-Czernik, B<sup>1,3,4\*</sup>

4     <sup>1</sup>Microbiome Consortium, <sup>2</sup>Center for Hypertension and Precision Medicine and <sup>3</sup>Department of  
5     Physiology and Pharmacology, <sup>4</sup>Department of Orthopedic Surgery, University of Toledo  
6     College of Medicine and Life Sciences, Toledo, Ohio; <sup>5</sup>Department of Veterinary & Biomedical  
7     Sciences, The Pennsylvania State University, University Park, PA

8

9     \*Corresponding authors:

10    Beata Lecka-Czernik, PhD  
11    Department of Orthopaedic Surgery, Mail Stop 1008  
12    College of Medicine and Life Sciences  
13    University of Toledo  
14    Toledo, Ohio 43614  
15    Phone: 419-383-4140  
16    [Beata.Leckaczernik@utoledo.edu](mailto:Beata.Leckaczernik@utoledo.edu)

17

18    Matam Vijay Kumar, PhD  
19    Department of Physiology and Pharmacology, Mail Stop 1008  
20    College of Medicine and Life Sciences  
21    University of Toledo  
22    Toledo, Ohio 43614  
23    Phone: 419-383-4130  
24    [MatamVijay.Kumar@utoledo.edu](mailto:MatamVijay.Kumar@utoledo.edu)

25

26

27 **Abstract**

28 The effect of microbiota on skeletal growth in adolescence has not been studied. Here, we  
29 present for the first time, an accelerated longitudinal and radial bone growth in response to short-  
30 term exposure of young germ-free rats to newly established gut microbiota. Seven-week-old  
31 germ-free male rats were colonized with microbiota through co-housing with conventional rats  
32 of the same sex and age. Changes in bone mass and structure were analyzed 10 days following  
33 the onset of colonization and revealed unprecedented acceleration of bone accrual, increased  
34 bone tissue mineral density, improved proliferation and hypertrophy of growth plate  
35 chondrocytes, and bone lengthening. The observed changes in bone status were paralleled with a  
36 dramatic increase in cecal concentration of short-chain fatty acids and increased hepatic *Igf-1*  
37 expression implicating an involvement of the somatotropic axis. Our studies demonstrate that gut  
38 microbiota can deliver powerful signals to the skeleton and accelerate bone expansion  
39 resembling adolescent growth spurt.

40

## 41 **Introduction**

42 Coined by Lynn Margulis in 1991, the term holobiont describes how macro-species, such as  
43 mammals, live in symbiosis with micro-species, whereby all individuals that participate in a  
44 particular symbiosis are bionts and the entire organism that is comprised of these bionts is a  
45 holobiont (Margulis & Fester, 1991; Simon et al., 2019). The human body is therefore a  
46 holobiont hosting an incredible number of microbial cells exceeding the number of cells in the  
47 entire human body (Sender et al., 2016). During evolution, these commensal microbes have  
48 colonized and co-evolved with the host as part of an internal ecosystem that orchestrates normal  
49 physiology. Any alteration in the composition of the micro-species, termed as microbial  
50 dysbiosis, is bound to affect normal physiology of the host.

51 In the last decade the concept of utilizing a reconstitution or correction to the gut microbiome as  
52 a therapeutic agent has been in various stages of development, none of them has received  
53 regulatory approval yet. Nonetheless, extensive studies in experimental animals on the level of  
54 basic research and ongoing clinical trials involving microbiota (Medicine, 2020) are very  
55 promising in delivering means of medical intervention to mitigate incurable conditions and  
56 augment existing therapies for treatment of recurring intestinal infections, bowel diseases,  
57 obesity, type 2 diabetes, osteoporosis and osteoarthritis (Davis, 2016; Gurung et al., 2020;  
58 Weingarden & Vaughn, 2017; Xu et al., 2017).

59 Contrasting effects of gut microbiota on bone formation in rats and mice have been reported.  
60 These disparities could result from the physiologic sensitivity of the gut microbiota-host  
61 relationship, where the experimental model, length of bacterial colonization, animal sex, strain,  
62 and age (Sjögren et al., 2012; Yan & Charles, 2017), and even housing environment and vendor

63 (Hernandez et al., 2016; Kang et al., 2015) variables can influence the gut microbiota-bone axis.  
64 A number of studies showed a positive effect of microbiota on bone in animal models of skeletal  
65 deficiencies and pathologies, as well as in humans with senile osteoporosis (Britton et al., 2014;  
66 Li et al., 2016; Park et al., 2017; Schepper et al., 2017; Xu et al., 2017). These studies have been  
67 aimed at finding novel remedies for bone-related ailments by utilizing bone-microbiota  
68 relationship as a target for intervention. However, the fundamental question of whether the  
69 holobiont derives signals from microbiota to facilitate host bone growth remains unanswered.  
70 Addressing this question will be important to exploit this synergy within the holobiont to bolster  
71 bone health of the host. Thus, in this study, we sought to examine the impact of acute exposure  
72 of the host to microbiota on bone growth using the experimental design of comparing bone mass  
73 and microarchitecture between gnotobiotic rats, which are depleted of microbiota and thereby  
74 represent the incomplete holobiont, and gnotobiotic rats reconstituted with microbiota which  
75 represent the complete holobiont. Altogether, this study unveils that the microbiota is imperative  
76 for skeletal homeostasis, where replenishing the micro-species rectifies bone growth that is  
77 stunted in microbiota ablation conditions.

## 78 **Results**

### 79 **Reconstitution of the holobiont with microbiota increases bone mass of the host**

80 To assess the immediate effect of gut microbiota on bone status we compared conventionalized  
81 germ-free rats (GFC) to their gnotobiotic or germ-free (GF) counterparts. Evaluation of cortical  
82 bone parameters at tibia midshaft and trabecular bone morphometry of proximal tibia were  
83 conducted using 3D images acquired by micro computed tomography (Fig. 1A and 1B). Cortical  
84 bone measurements revealed that within the short period of 10 days, GFC rats significantly  
85 gained bone mass. Total cross-sectional area (T.Ar), bone area (B.Ar), and cortical thickness

86 (Ct.Th) increased by 12.6%, 15.6%, and 11%, respectively (Fig. 1C-E). Marrow area (M.Ar)  
87 remained the same in both groups indicating that bone apposition in GFC rats occurred mainly  
88 on the periosteal surface (Supplementary Table 2). Body weight average for GFC rats was  
89 significantly increased by 27.3% (GF mean 205.7 g  $\pm$  SD 30.2, GFC mean 261.8 g  $\pm$  SD 13.3,  
90  $p=0.002$ ) suggesting that bone expansion may result from increased mechanical loading.  
91 However, while calculation of Pearson correlation coefficient ( $r$ ) for cortical parameters versus  
92 body weight of GF animals showed that B.Ar ( $r=0.86$ ), T.Ar ( $r=0.99$ ), and Ct.Th ( $r=0.68$ )  
93 positively correlated with animal weights, in GFC animals T.Ar correlation was significantly  
94 lower ( $r=0.45$ ) and B.Ar and Ct.Th correlated negatively with respective  $r$  values of  $-0.39$  and  $-$   
95  $0.78$ . These data suggest that mechanical loading is not a major factor in driving cortical bone  
96 accrual. Instead, it may be associated with increased nutrition provided by gut microbiota  
97 fermentation of complex carbohydrates, but more importantly resulting from a molecular  
98 signaling along the gut-bone axis. It is important to stress that bone mass gain judged by an  
99 increase of mean cortical thickness in GFC rats was extensive considering the short time  
100 exposure to gut microbiota in GFC rats. Reported periosteal bone apposition rate in male rats of  
101 comparable age and body weight is on average 0.05 micron/hour (Stenstrom et al., 1977; Tam et  
102 al., 1978). Mean difference in cortical thickness between GF and GFC rats at the time of  
103 sacrifice was 47 micron, and gained over 10 days, giving an apparent apposition rate of 0.19  
104 micron/hour. At the same time tissue mineral density (TMD) (Fig. 1F) in cortical bone was  
105 statistically increased in GFC rats but only by 2.1% which seemed to be less than expected for 4-  
106 fold increase in the apposition rate. Finally, calculations of bone moment of inertia at tibia  
107 midshaft showed that in GFC rats predicted bending strength perpendicular to the minimal  
108 ( $I_{min}$ ) and maximal ( $I_{max}$ ) axes of the bone cross sections were statistically increased, as well as

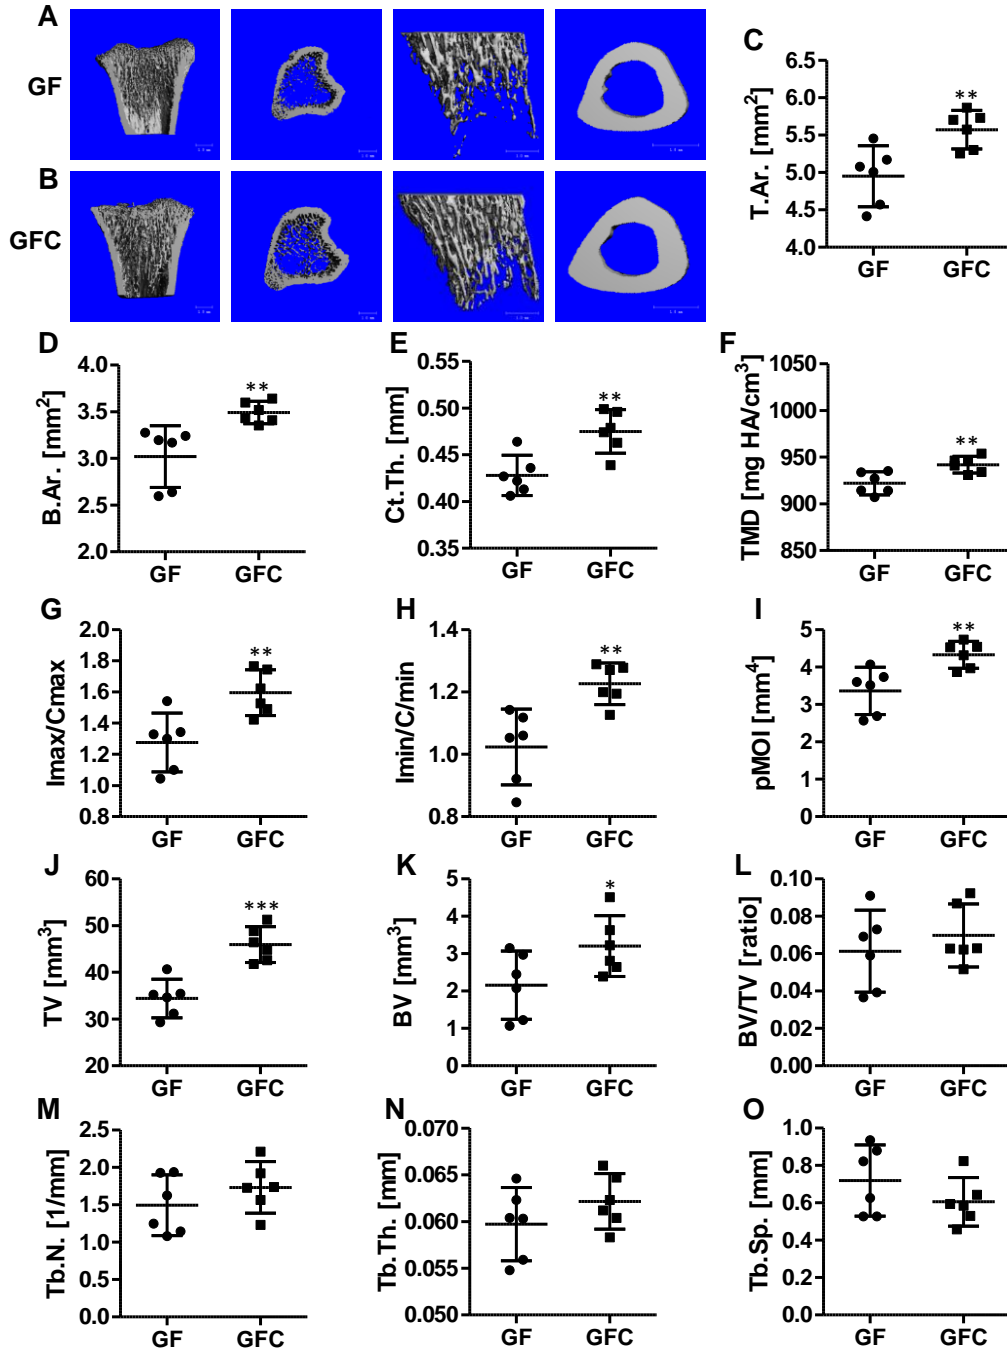

109

**Figure 1.** Acute effect of gut microbiota on bone mass and structure in germ-free conventionalized rats. A and B. mCT bone renderings of tibia of GF (A) and GFC (B) rats. From left to right: proximal tibia longitudinal sections, transverse sections 2 mm down from growth plate, trabecular bone compartment, and bone cross sections at tibia midshaft. C – F. Measurements of cortical bone at tibia midshaft. T.Ar – total area; B.Ar – bone area; Ct.Th – cortical thickness; TMD – tissue mineral density. G – I. Computed moment of inertia show respectively resistance to bending (Imax/Cmax, Imin/Cmin) and torsion (pMOI). J – O. Proximal tibia trabecular bone morphometry. TV – tissue volume; BV – bone volume, BV/TV – bone mass ratio; Tb.N – trabecular number; Tb.Th – trabecular thickness; Tb.Sp – trabecular spacing. \*: p<0.05, \*\*: p<0.01, \*\*\*: p<0.001

110 the torsional strength along the bone (Fig. 1G-I). Cumulatively, our findings imply that gut  
111 microbiota is capable of inducing an acute response resulting in bone mass increase and  
112 enhancement in bone mechanical properties. Measurements of trabecular bone in proximal tibia  
113 revealed statistical gains in total volume and bone volume with bone volume/total volume ratio  
114 remaining unchanged (Fig. 1J-L). This indicated overall bone expansion without formation of  
115 additional trabeculae. On the other hand, trabecular number and thickness were slightly increased  
116 and trabecular spacing was consequently decreased in GFC rats (Fig. 1M-O). While these  
117 differences albeit not statistically significant, nevertheless indicated the same trend of bone gain  
118 as observed in cortical bone. Assessment of trabecular bone in L4 vertebral body did not show  
119 significant differences in morphometric parameters except for the total bone size increase in  
120 GFC rats (Supplementary Table 3).

### 121 **Periosteal bone apposition increases cortical bone mass**

122 Micro CT measurements of cortical bone at tibia midshaft showed significant bone mass  
123 accumulation in GFC rats and implied that periosteal bone apposition was responsible for this  
124 increase. However, this analysis was conducted on a thin 0.5 mm tomographic segment of tibia.  
125 In order to validate this result on a broader scale and to get an insight into the nature of bone  
126 accumulation on a cellular level, we conducted histologic analysis of approximately 12 mm  
127 longitudinal sections of tibia diaphysis. Microscopic examinations of these specimens clearly  
128 demonstrated noticeable differences between GF and GFC rats in the distribution of  
129 circumferential lamellar bone. Measurements of areas occupied by lamellar bone on the  
130 periosteal surfaces showed an enlargement of this compartment by 5-fold with mean thickness  
131 increased over 2-fold in GFC versus GF rats (Fig. 2A-C). On the endosteal surfaces, area and  
132 mean thickness were quite the same in both animals (Fig. 2A and 2B). These results indicate that

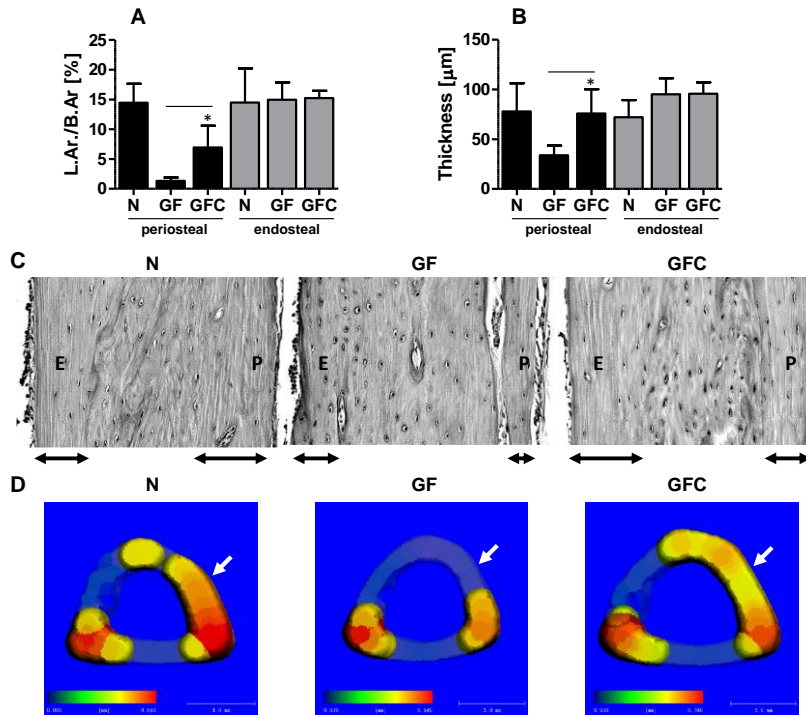

133

**Figure 2.** Circumferential lamellar bone apposition in tibia diaphysis of GF and GFC rats. A. Percent of periosteal bone (black bars) and endosteal bone (grey bars) occupied by lamellar bone in normal (N), GF and GFC rats. B. Mean thickness of the same bone regions. C. Images of representative histologic specimens of cortical bone used for measurements of N, GF, and GFC rats. Two-headed arrows indicate the extent of lamellar bone. P – periosteal bone; E – endosteal bone. D. Representative mCT renderings of tibia midshaft cross sections showing distribution of bone thickness in N, GF, and GFC rats over 0.44 mm thickness threshold. Blue color in scale bar indicate 0.0 mm thickness, red color indicates maximum thickness for given specimen. Transparent bone sections show thickness below 0.44 mm, white arrows point towards anteromedial bone surface. \*:  $p < 0.05$

134 indeed accelerated periosteal bone apposition is likely responsible for increased cortical bone  
 135 mass in GFC rats. Histologic specimens used for these measurements were cut longitudinally and  
 136 parallel to anterior-posterior axis of tibia, therefore only anterior and posterior surfaces could be  
 137 measured in these specimens. In order to assess the distribution of change in thickness around the  
 138 tibia shaft we analyzed 4 tomographic slices spaced evenly along the length and location  
 139 comparable to histologic specimens. Visualizations of local thicknesses were obtained in these  
 140 slices using conventional sphere method of distance transformation available in our image  
 141 analysis software package. Interestingly, the increase in bone thickness in GFC animals was



142 localized to the anteromedial section of the cortex and spanning approximately 1/3 of the bone  
143 circumference (Fig. 2D). This section of the tibia receives most of the strain (Gross et al., 2002).  
144 Assuming that GF and GFC animals experience a comparable bone adaptation to habitual  
145 mechanical loading the observed difference in local bone thickness suggests that microbiota  
146 accelerate osteogenesis around sites subjected to increased mechanical stimulation.

### 147 **Microbiota stimulate growth plate enlargement, chondrocyte maturation and longitudinal** 148 **bone growth**

149 In the course of characterizing a skeletal response to the reconstitution of the holobiome, we  
150 measured differences in tibial length between GF and GFC rats and assessed morphology of the

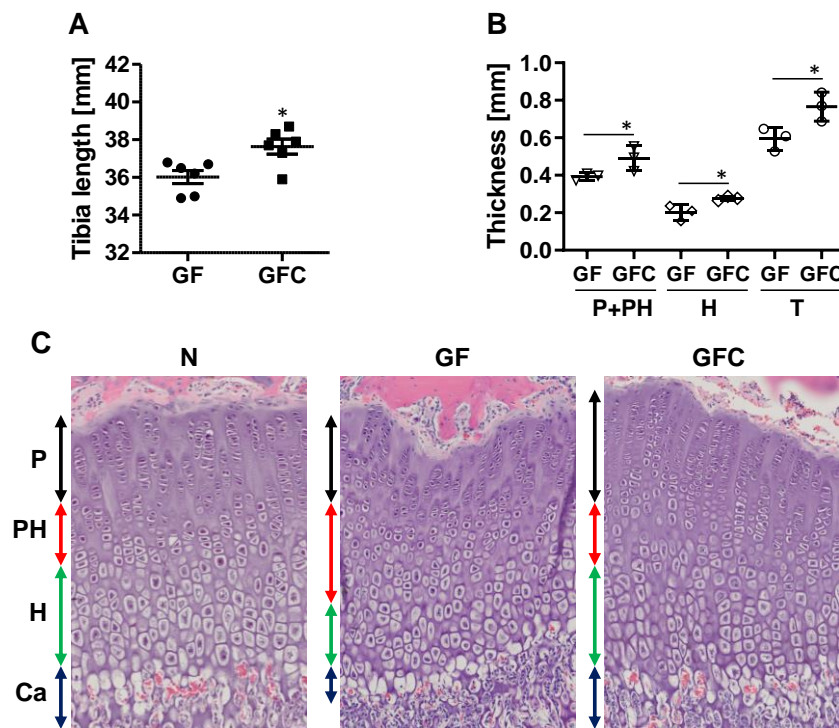

**Figure 3.** Microbiota-induced growth plate enlargement and improved chondrocyte maturation and calcification promote longitudinal bone growth. A. Total tibia length. B. Measurements of proximal tibia growth plate: P+PH - combined proliferative and prehypertrophic zone thickness (open triangles), H - hypertrophic zone thickness (open diamonds), and T - total thickness (open circles). C. Images of histologic specimens of normal (N), GF, and GFC growth plates. Two-headed arrows indicate growth plate zones, P - proliferative (black), PH - prehypertrophic (red), H - hypertrophic (green), and Ca - calcification (blue). \*:  $p < 0.05$

151 epiphyseal plate in proximal tibia (Fig. 3). Mean tibial length was significantly increased by 1.6  
152 mm in GFC rats over 10 day of conventionalization period with individual lengths ranging from  
153 35.9 mm to 38.7 mm, while in GF rats the length range was from 34.9 mm to 36.8 mm (Fig. 3A).  
154 Reported longitudinal growth rate in Sprague-Dawley rats at 10 weeks of age is  $97 \pm 7$   $\mu\text{m}$  per  
155 day (Hansson et al., 1972). This comparison shows that tibia longitudinal growth rate was greatly  
156 accelerated in GFC rats which were gaining 160  $\mu\text{m}$  of length per day over apparently lower  
157 growth rate in GF rats. Histologic examinations of decalcified sections of proximal tibia revealed  
158 that mean epiphyseal plate thickness was significantly increased in GFC animals by 29% and  
159 correlated with dramatic changes in morphology of the plate growth zones (Fig. 3B and 3C).  
160 Cumulative thickness of the proliferation and prehypertrophic zones in GFC animals was  
161 increased by 25%, while hypertrophic zone thickness was increased by 37%, as compared to GF  
162 animals (Fig. 3B). Changes in the thickness of growth plate zones were accompanied by  
163 substantial changes in their morphology (Fig. 3C). In GF rats as compared to normal rats, the  
164 proliferative and prehypertrophic zones, which deliver maturing chondrocytes, are characterized  
165 by low number of cells and affected spatial organization. Similarly, in hypertrophic zone, mature  
166 chondrocytes producing a matrix rich in collagen X are lower in number and are disorganized.  
167 These result in poorly developed calcification zone with affected vascular invasion, which is  
168 prerequisite for formation of primary spongiosa and trabecular bone in the process of  
169 endochondrial ossification. Remarkably, 10 days of exposure to host holobiont reversed all  
170 abnormalities of growth plate of GF rats, and reactivated proliferative zone which resulted in  
171 high number of dividing chondroblasts of discoidal shape and organized in characteristic regular  
172 columns (Fig. 3C). Thus, gut microbiome is directly involved in the regulation of longitudinal  
173 bone growth by acting on chondrocyte progression and maturation in GFC rats.

174 **Reconstitution of gut microbiota increases bone marrow adiposity**

175 Bone marrow adipose tissue (BMAT) is an essential component of the marrow environment  
176 contributing to hematopoiesis, osteogenesis and energy metabolism, and it responds to changes  
177 in diet, age, and energy demands (Horowitz et al., 2017; Li et al., 2019). BMAT constitutes of  
178 adipocytes with different functions depending on their origin and skeletal localization (Lecka-  
179 Czernik et al., 2017). In humans, in the so called “red marrow” where hematopoiesis occurs,  
180 adipocytes are dispersed among hematopoietic components and constitute 45% of cells. In  
181 contrast, the so called “yellow marrow” is composed of densely packed adipocytes constituting  
182 95% of cells and is not permissive for hematopoiesis (Lecka-Czernik et al., 2017; Moore &  
183 Dawson, 1990). In mice, these two compartments are corresponding to BMAT located in  
184 proximal and distal tibia, respectively. Thus, in proximal tibia marrow adipocytes are dispersed  
185 and respond to environmental changes, such as cold exposure and caloric restriction, which  
186 prompted naming this depot as regulated marrow adipose tissue (rMAT). In contrast, BMAT  
187 located in the distal part of tibia consists of densely packed adipocytes and appears to be resistant  
188 to the environmental cues, prompting the name of constitutive marrow adipose tissue (cMAT)  
189 (Scheller et al., 2015). In rat tibia, rMAT is extending from the proximal location through the  
190 diaphysis past tibiofibular junction and is composed of small cells dispersed in marrow  
191 hematopoietic compartment, while cMAT is found in the distal tibia where cells are larger and  
192 densely packed. Little is known on the effect of microbiota on the BMAT function and the way  
193 the holobiont is involved in differentiation and regulation of the marrow adipocytes. We found  
194 that reconstitution of the holobiont in GFC rats increased adipocyte number and altered cell size  
195 distribution, as compared to GF animals (Fig. 4). Histologic evaluation of longitudinal sections  
196 of tibia diaphysis revealed increased adipocyte density by 26% and increased total area occupied

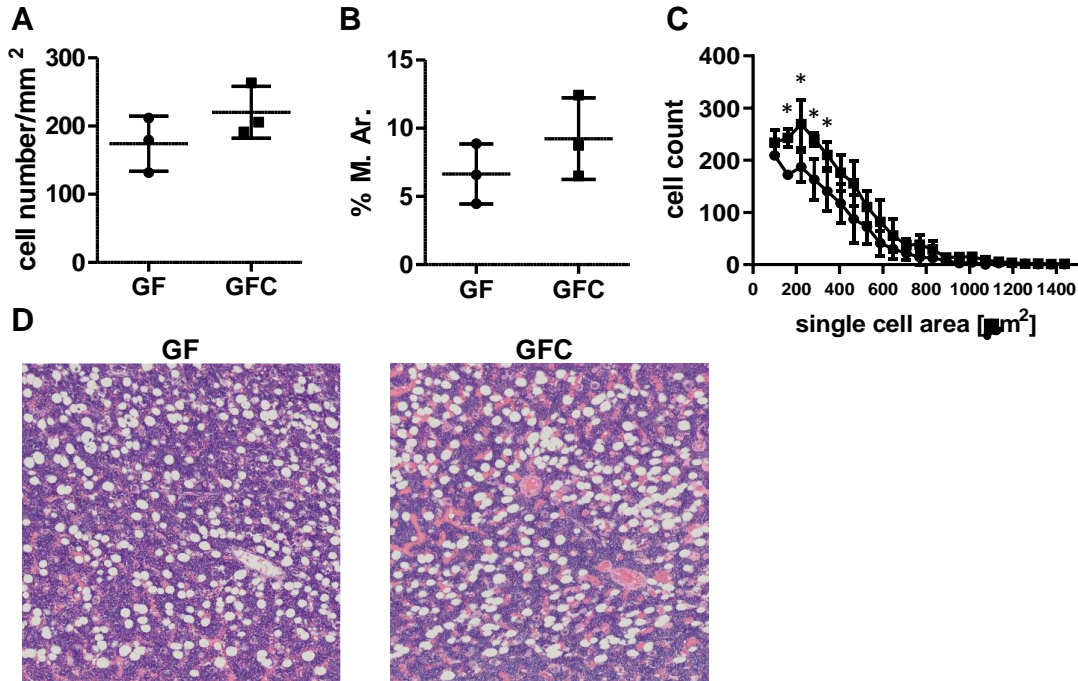

197

**Figure 4.** Effect of microbiota on bone marrow adiposity and size distribution of adipocytes. A. Mean adipocyte cell number per square millimeter of bone marrow. B. Percentage of marrow area (M.Ar) occupied by adipocytes in 12 mm long section of diaphysis. C. Quantitative distribution of adipocyte size in GF (black circles) and GFC (black squares) animals. D. Representative sections of bone marrow histologic specimens from GF and GFC rats. \*: p<0.05

198

199 by adipocytes by 39% in GFC rats (Fig. 4A and 4B). These differences, although substantial,  
200 were not statistically significant. However, more detailed analysis of adipocyte size distribution  
201 (Fig. 4C) revealed that the number of smallest cells, ranging from 15 to 24 microns in diameter  
202 and constituting approximately 50% of all adipocytes present in the examined specimens, was  
203 nearly doubled in bone marrow of GFC rats while maintaining histology of adipocytes dispersed  
204 in marrow (Fig. 4D). Simultaneously, bone mass was significantly increased in GFC rats  
205 suggesting that *de novo* expansion of small size adipocytes and parallel osteoblast differentiation  
206 may result from microbiota-derived stimulus which promote general differentiation of MSC but  
207 not by redirecting differentiation of osteoblast/adipocyte common progenitor cells towards  
208 adipocytes (Lecka-Czernik et al., 1999).

209 **Lack of evidence for genes which are directly involved in bone formation and resorption as**  
210 **underlying contributors to bone growth facilitated by microbiota**

211 Next, we sought to identify putative effector genes responsible for the observed acceleration of  
212 bone mass accumulation in GFC rats by the analysis of gene expression using RNA isolated  
213 from bone marrow and bone tissue from tibia diaphysis. Collagen 1a1 (*Col1A1*), osteocalcin  
214 (*Bglap*), osterix (*Osx*) and sclerostin (*Sost*) were reporters of osteoblast/osteocyte activities and  
215 bone formation, whereas osteoprotegerin (*Opg*) and receptor activator of nuclear factor kappa-B  
216 ligand (*Rankl*) were reporters of the extent of osteoclastogenesis. Similarly, distal-less  
217 homeobox5 (*Dlx5*) and Wnt family member 10B (*Wnt10B*) were selected as markers of  
218 osteoblastogenesis, whereas Wnt family member 16 (*Wnt16*) and periostin (*Postn*) were used as  
219 markers of periosteal bone apposition. We also measured expression of adiponectin (*Adipoq*),  
220 fatty acid binding protein 4 (*Fabp4*) and peroxisome proliferator-activated receptor gamma  
221 (*Pparγ*) to assess bone-related activities of bone marrow adipocytes. Surprisingly, we did not  
222 detect any statistically significant differences in the expression of the analyzed genes neither in  
223 mineralized bone compartment nor in bone marrow, which were either expressed similarly in GF  
224 and GFC animals, or which expressions varied significantly within these groups (Supplementary  
225 Fig. 1 and Fig. 2). At this point we hypothesized that genes which are directly involved in bone  
226 formation and resorption, are less likely to be direct acceptors of regulatory signals resulting  
227 from bacterial colonization of the gut, leading us to shift our focus onto systemic regulatory  
228 factors.

229 **Microbiota promote bone growth of the host via the short chain fatty acid butyrate as a**  
230 **metabolite signaling for IGF-1 expression**

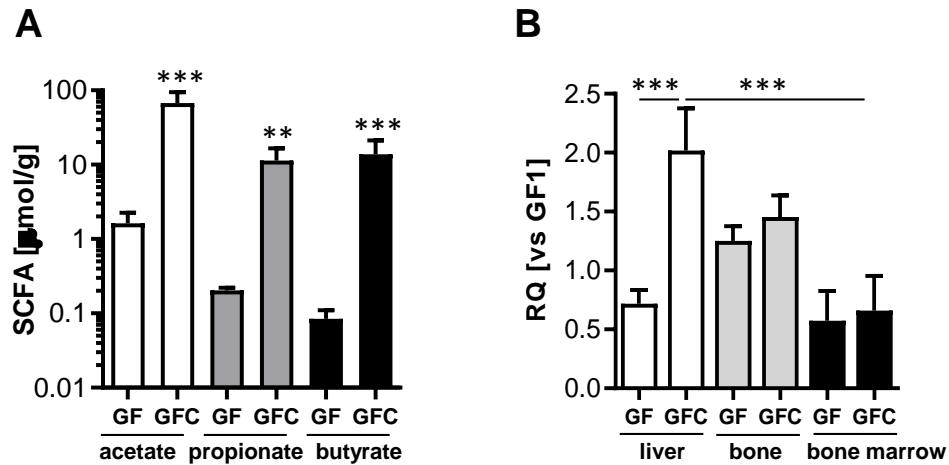

231

**Figure 5.** The effect of microbiota on cecal concentration of SCFA and concomitant *Igf-1* mRNA expression in liver, bone, and bone marrow. A. Cecal concentrations of acetate (white bars), propionate (grey bars), and butyrate (black bars) in GF and GFC rats. B. Relative quantities (RQ) of *Igf-1* transcripts measured by qPCR in liver (white bars), bone (grey bars), and bone marrow (black bars), relative to the highest value in GF group (GF1 rat). \*\*:  $p < 0.01$ , \*\*\*:  $p < 0.001$

232 To determine whether any of the microbial-generated metabolites in systemic circulation of the  
233 host were different between GF and GFC rats, we conducted a targeted metabolomics analysis of  
234 their ceca. All three short-chain fatty acids (SCFAs), acetate, propionate and butyrate were  
235 significantly higher in the GFC compared to GF rats (Fig. 5A). Importantly, a dramatic 160-fold  
236 increase was observed in the concentration of butyrate in GFC animals compared to GF rats.  
237 Butyrate is a known metabolite capable of signaling to regulate the IGF-1 anabolic effect on  
238 bone (S. Yakar et al., 2002; Yan et al., 2016). *Igf-1* is primarily expressed in liver and its  
239 availability is controlled by growth hormone (GH) and IGF-binding proteins (Pacifici, 2018;  
240 Silva et al., 2020). It is also locally expressed in bone cells and marrow mesenchymal stem cells  
241 (Lazarenko et al., 2007; Sheng et al., 2013) The level of *Igf-1* expression was significantly  
242 increased by 3-fold in the liver of GFC rats, whereas in GFC bone and bone marrow expression  
243 remained on the same level as in GF rats (Fig. 5B). Interestingly, GF animals are not devoid of  
244 *Igf-1* and do express this hormone, and GFC animals experienced significant but moderate *Igf-1*

245 upregulation. This observation suggests that reconstitution of microbiota results in *de novo*  
 246 supply of butyrate which signals *via* modulation of *Igf-1* expression in the liver to restore the  
 247 threshold of the circulating hormone to the level required for efficient bone formation (S. Yakar  
 248 et al., 2002).

#### 249 **Elevated levels of serum markers of bone mineralization and liver function in GFC rats**

250 To further explore systemic features aligned with the osteogenic effect resulting from the  
 251 presence of newly established microbiota in GFC rats, we analyzed 15 blood serum markers and  
 252 electrolytes indicative of bone, liver and kidney function (Table 1). Most of the assessed markers  
 253 remained at comparable levels in GF and GFC animals, and were considered normal when  
 254 compared to reference values published for normal wild-type male Sprague-Dawley rats (Col et  
 255 al., 2009; Lillie et al., 1996; Zaias et al., 2009). These included protein and electrolyte markers,  
 256 namely amylase (AMY), creatinine (CRE), globulin (GLOB), total protein (TP), phosphorous  
 257 (Phos), sodium (Na) and potassium (K) (Table 1).

258 **Table 1.** Serum comprehensive diagnostic profile

| Animal        | ALB<br>(g/dl) | ALP<br>(U/L) | ALT<br>(U/L) | AMY<br>(U/L) | TBIL<br>(mg/dl) | BUN<br>(mg/dl) | Ca<br>mg/dl  | Phos<br>(mg/dl) | CRE<br>(mg/dl) | GLU<br>(mg/dl) | Na<br>(mmol/l) | K<br>(mmol/l) | TP<br>(g/dl)  | GLOB<br>(g/dl) |
|---------------|---------------|--------------|--------------|--------------|-----------------|----------------|--------------|-----------------|----------------|----------------|----------------|---------------|---------------|----------------|
| GF1           | 5.30          | 308.0        | 34.0         | 903.0        | 0.30            | 20.0           | 10.9         | 8.40            | 0.70           | 204.0          | 147.0          | 5.30          | 6.40          | 1.20           |
| GF2           | 5.20          | 331.0        | 47.0         | 825.0        | 0.30            | 20.0           | 11.3         | 9.30            | 0.60           | 193.0          | 145.0          | 5.30          | 6.20          | 1.00           |
| GF3           | 5.10          | 265.0        | 51.0         | 806.0        | 0.30            | 15.0           | 11.3         | 8.90            | 0.40           | 232.0          | 149.0          | 5.20          | 6.10          | 1.10           |
| GF5           | 5.60          | 288.0        | 44.0         | 579.0        | 0.30            | 25.0           | 10.8         | 8.40            | 0.30           | 319.0          | 143.0          | 4.60          | 6.10          | 0.50           |
| GF6           | 5.60          | 350.0        | 62.0         | 618.0        | 0.30            | 24.0           | 11.3         | 8.90            | 0.30           | 204.0          | 148.0          | 5.30          | 6.30          | 0.60           |
| <b>Mean</b>   | <b>5.36</b>   | <b>308.4</b> | <b>47.6</b>  | <b>746.2</b> | <b>0.30</b>     | <b>20.8</b>    | <b>11.1</b>  | <b>8.78</b>     | <b>0.46</b>    | <b>230.4</b>   | <b>146.4</b>   | <b>5.14</b>   | <b>6.22</b>   | <b>0.88</b>    |
| GFC1          | 5.00          | 415.0        | 37.0         | 831.0        | 0.30            | 19.0           | 10.9         | 9.80            | 0.20           | 241.0          | 144.0          | 5.10          | 5.80          | 0.90           |
| GFC2          | 4.80          | 356.0        | 57.0         | 757.0        | 0.30            | 16.0           | 10.6         | 8.80            | 0.40           | 242.0          | 144.0          | 4.70          | 5.50          | 0.80           |
| GFC3          | 4.40          | 343.0        | 84.0         | 790.0        | 0.30            | 18.0           | 10.2         | 9.30            | 0.20           | 231.0          | 143.0          | 5.30          | 5.30          | 0.90           |
| GFC4          | 4.40          | 489.0        | 64.0         | 760.0        | 0.30            | 17.0           | 10.0         | 8.10            | 0.50           | 203.0          | 141.0          | 4.90          | 5.20          | 0.80           |
| GFC5          | 4.40          | 460.0        | 39.0         | 720.0        | 0.30            | 19.0           | 10.4         | 8.30            | 0.60           | 220.0          | 143.0          | 5.20          | 5.20          | 0.90           |
| GFC6          | 4.40          | 405.0        | 44.0         | 712.0        | 0.30            | 19.0           | 10.8         | 9.40            | 0.30           | 238.0          | 148.0          | 5.30          | 5.30          | 0.90           |
| <b>Mean</b>   | <b>4.57</b>   | <b>411.3</b> | <b>54.2</b>  | <b>761.7</b> | <b>0.30</b>     | <b>18.0</b>    | <b>10.5</b>  | <b>8.95</b>     | <b>0.37</b>    | <b>229.2</b>   | <b>143.8</b>   | <b>5.08</b>   | <b>5.38</b>   | <b>0.87</b>    |
| <b>T-test</b> | <b>0.001</b>  | <b>0.006</b> | <b>0.490</b> | <b>0.803</b> | <b>1.000</b>    | <b>0.134</b>   | <b>0.008</b> | <b>0.627</b>    | <b>0.392</b>   | <b>0.956</b>   | <b>0.106</b>   | <b>0.738</b>  | <b>0.0001</b> | <b>0.919</b>   |

a) Reference values were obtained from published sources cited in Materials and Methods section.

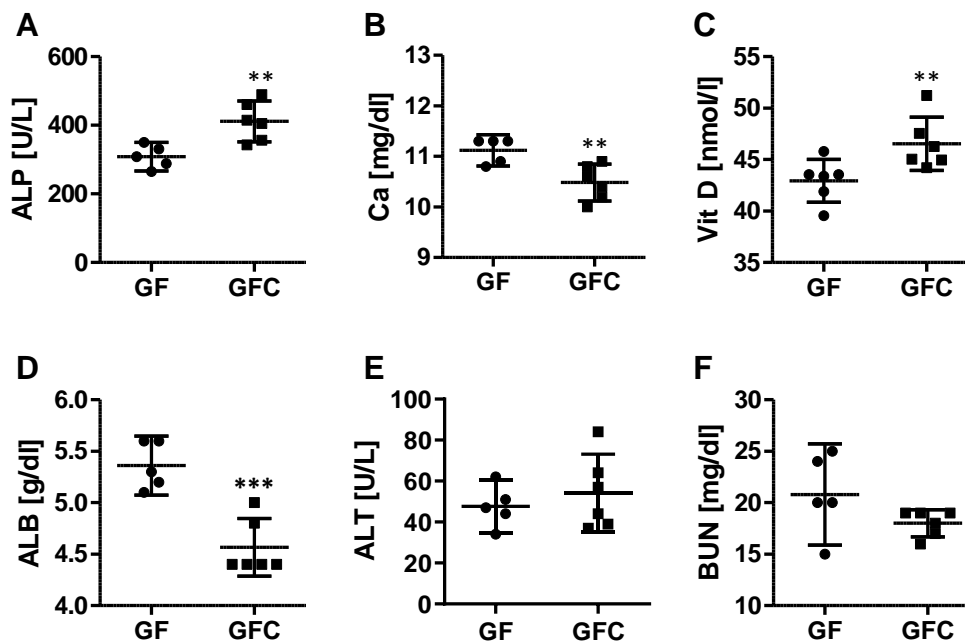

**Figure 6.** Changes in serum markers of bone mineralization and liver function in GF and GFC rats. Graphs A, B, and C respectively show bone markers concentrations of alkaline phosphatase (ALP), calcium (Ca), and vitamin D. Graphs D, E, and F show liver markers concentrations of albumin (ALB), alanine transaminase (ALT), and blood urea nitrogen (BUN). \*\*:  $p < 0.01$ , \*\*\*:  $p < 0.001$

259 In contrast, alkaline phosphatase (ALP) level was significantly elevated by 33% concurring *de*  
260 *novo* osteogenesis in GFC animals (Fig. 6A). Serum calcium concentration (Ca) was  
261 significantly decreased by 6% in GFC versus GF rats most likely as a result of increased bone  
262 formation (Fig. 6B), with 25-OH vitamin D serum level significantly increased by 8% (Fig. 6C)  
263 suggesting a physiologic response to increased calcium demand. Among the most prominent  
264 features was serum albumin (ALB), which was elevated in GF animals by 75%, as compared to  
265 reference values, and was significantly reduced in GFC rats to being elevated by only 48% (Fig.  
266 6D). There is very limited information regarding hyperalbuminemia in animals and humans  
267 except that it is a rare condition which is mainly associated with dehydration (Walker et al.,  
268 1990). However, globulin level, albeit markedly lower than the reference value, was identical in



269 both groups with the total serum protein decrease following that of the albumin (Table 1), which  
270 indicated that dehydration was unlikely to be responsible for high albumin level.

271 Few veterinary cases were reported where hyperalbuminemia was associated with hepatocellular  
272 carcinoma, and a couple of cases in humans that were associated with prolonged ingestion of  
273 high protein diet (Cooper et al., 2009; Mutlu et al., 2006). Alanine transaminase (ALT), a marker  
274 of liver dysfunction, and blood urea nitrogen (BUN), a marker of kidney failure and increased  
275 protein degradation in liver, were evenly elevated but not different in both GF and GFC rats (Fig.  
276 6E-F) by 75% and 52%, as compared to reference values shown in Table 1. However, creatinine  
277 readings were standard in both groups of animals suggesting normal kidney function. These  
278 observations imply that liver function, manifested by an increase in ALT and BUN, and  
279 unexpected elevation in ALB synthesis, is affected by the lack of microbiota and is not fully  
280 restored by a short-term presence of gut microbiota, except for partial normalization of ALB  
281 level.

## 282 **Discussion**

283 Recent advances in research addressing systemic gut host-microbiota interactions show that bone  
284 is a significant component of the holobiome being strongly tied to the status of gut microbiota. In  
285 this paper we show for the first time that *de novo* introduction of gut microbiota to GF rat can  
286 lead to abrupt increase in bone mass, acceleration of longitudinal bone growth and increased  
287 bone mineralization. To our knowledge, the observed phenotype is unprecedented considering  
288 that the observed changes occurred within 10-day time window following gut colonization.  
289 Further, one of the underlying mechanisms for the pronounced increase in bone growth was

290 traceable as mediated by the acute effects of signaling of the microbial metabolite, butyrate, to  
291 increase host *Igf-1*.

292 IGF-1 is crucial for normal growth and development of the skeleton and has been recognized as a  
293 hormone regulating cortical bone mass by acting on osteoblasts, and in combination with  
294 mechanical loading, increasing periosteal bone apposition (Gross et al., 2002) and longitudinal  
295 bone growth by augmenting hypertrophy of growth plate chondrocytes (Repudi et al., 2013; J.  
296 Wang et al., 1999). This is especially important in the context of skeletal development and  
297 maturation during adolescence, wherein production of IGF-1 is induced by circulating growth  
298 hormone. Our work here indicates that *Igf-1* is also regulated by acute exposure of the host to  
299 microbiota. Dramatic increase of cecal butyrate concentration observed in GFC rats paralleled  
300 with enhanced expression of *Igf-1* in the liver suggests that the somatotrophic axis is one of the  
301 targets involved in bone enhancement. Recently, it has been shown that butyrate increases  
302 intracellular calcium levels and boost release of GH from pituitary acting on G-protein coupled  
303 receptors (Miletta et al., 2014). Although it was demonstrated that butyrate stimulates bone  
304 formation by increasing *Wnt10B* expression in bone marrow CD8<sup>+</sup> T cells (Tyagi et al., 2018),  
305 we did not detect any difference in the expression of this ligand in bone marrow of GF and GFC  
306 animals making WNT signaling pathway less likely to be involved. Significant increase in the  
307 expression level of liver *Igf-1* observed in GFC rats may also have resulted from a direct effect  
308 of butyrate signaling. It has been shown that consequent to gut microbiota-mediated increase in  
309 SCFA, the level of liver *Igf-1* is induced independently of GH stimulation and promotes bone  
310 formation (Yan et al., 2016). Parallel to endocrine action of circulating IGF-1 autocrine/paracrine  
311 signaling is achieved by its expression in all bone cell lineages and skeletal stem cells and  
312 exerting its effects on osteoblasts, osteocytes, and osteoclasts *via* IGF-1 receptor (Guntur &

313 Rosen, 2013; Y. Wang et al., 2013). The *Igf-1* mRNA expression in bone marrow and in bone  
314 tissue of GF and GFC rats were on the same level suggesting that the endocrine action of liver  
315 IGF-1 likely contributed to the accelerated bone formation in GFC animals.

316 Fermentation of complex carbohydrates in the colon by microbiota results in production SCFAs,  
317 acetate, propionate and butyrate, which act as regulatory metabolites on a variety of physiologic  
318 processes. Among them butyrate is a prominent modulator of bone homeostasis by affecting  
319 process of bone remodeling. Increased SCFA concentrations reduce osteoclastogenesis by  
320 shifting preosteoclast cellular metabolism towards glycolysis, block differentiation by inhibiting  
321 histone deacetylase, and in consequence limit bone resorption resulting in net gain of bone mass  
322 (Lucas et al., 2018; Rahman et al., 2003). On the other hand, butyrate upregulates osteoblast  
323 differentiation and proliferation by upregulation of WNT10b in bone marrow stromal cells  
324 resulting in increased bone formation (Tyagi et al., 2018). We postulate that in our model, SCFA,  
325 and particularly butyrate, is the primary signal which *in vivo* initiates cascade of molecular  
326 events leading to the acceleration of bone accrual.

327 Skeletal changes in GFC rats assessed in tibia bone were manifested by increased midshaft  
328 cortical thickness, expansion of trabecular bone, lengthening of tibia, and overall increase in  
329 bone size. All of these changes can be attributed to endocrine activity of circulating IGF-1.

330 Analysis of cortical bone accrual revealed that bone gain in GFC animals was localized to the  
331 periosteal surface and formation of circumferential lamellar bone with no change to the  
332 endosteum, which is consistent with the overall endocrine effect of IGF-1 (Lindsey & Mohan,  
333 2016; Stratikopoulos et al., 2008; Yakar et al., 2009). On the other hand, micro CT analysis of  
334 local changes in cortical bone thickness along tibia diaphysis showed that the maximal increase  
335 was localized to the anteromedial surface of tibia midshaft region, which is normally exposed to

336 maximal dynamic strain during habitual loading. It is accepted that anabolic effect of mechanical  
337 loading on the adaptative bone formation is tied to paracrine effect of locally expressed IGF-1  
338 (Gross et al., 2002). Thus, the observed radial expansion of cortical bone in GFC animals most  
339 likely resulted from a combination of endocrine and paracrine effects of IGF-1 responding to the  
340 SCFA signal emerging from the reconstituted gut microbiota.

341 Reconstitution of gut microbiota in GFC animals had profound effect on the maturation of  
342 chondrocytes in the growth plate of proximal tibia and manifested by expansion of proliferative  
343 and hypertrophic zones and overall thickening of the epiphysis. This in turn accelerated  
344 longitudinal growth as compared to GF animals, as differentiation of proliferating chondrocytes  
345 into hypertrophic chondrocytes is crucial for bone lengthening (Tahimic et al., 2013). Again,  
346 maturation of epiphyseal chondrocytes remains under the control of IGF-1, similarly to the rest  
347 of bone forming cells (Reinecke et al., 2000). The observed phenomenon can be attributed to  
348 increased GH release from pituitary mediated by SCFA production in the gut, but it remains to  
349 be defined if paracrine, endocrine or both activities of IGF-1 are involved in this particular  
350 physiologic response.

351 Cortical thickness and the ratio of bone area to total cross-sectional area at tibia midshaft  
352 (B.Ar/T.Ar) in individual GF rats was positively correlated with their respective body mass,  
353 indicating that a fundamental principle of bone functional adaptation to body mass (Frost, 1987;  
354 Iwaniec & Turner, 2016) is maintained even in the absence of gut microbiota. However, we  
355 determined that these correlations are negative in GFC animals regardless of significant increase  
356 in their body weight, as compared to GF rats. This indicates that processes regulating bone  
357 accrual become temporarily independent of the mechanostat (Frost, 1987, 1996, 2003) and that  
358 additional mechanism(s) take over to accelerate bone growth and restore a balance between body

359 weight and skeleton resembling spurt growth naturally occurring in rats and humans  
360 (Hermanussen et al., 1998; Roach et al., 2003; Styne, 2003).

361 Expansion of BMAT observed in GFC animals is an intriguing phenomenon because it was  
362 accompanied by bone accumulation. However, bone accumulation in GFC rats occurs on the  
363 periosteal surface thus reciprocal relationship between adipocytes and osteoblasts differentiation  
364 from the common mesenchymal progenitor, which conforms belief that “marrow fat gain is bone  
365 loss”, seems to be not relevant in this model (Lecka-Czernik & Stechschulte, 2014; Z. Li et al.,  
366 2018). On the other hand, BMAT is characterized with high heterogeneity reflecting both,  
367 diverse origin of marrow adipocytes and different responsiveness to environmental cues. For  
368 example, GH and IGF-1 axes, which are probably upregulated in our model, in general have a  
369 negative effect on marrow adiposity making them less likely to be involved in observed BMAT  
370 expansion (Menagh et al., 2010). Although very little is known about the effect of microbiota  
371 and SCFA on marrow adipocytes, there are some indications of direct gut-BMAT  
372 communication with one report showing spontaneous adipocytic differentiation of mesenchymal  
373 cells derived from pig bone marrow in response to butyrate treatment (Tugnoli et al., 2019) and  
374 the other showing increased adipogenesis and decreased osteogenesis in germ-free-  
375 conventionalized mice (Xiao et al., 2017). However, besides determining axes stimulating  
376 BMAT expansion in GFC rats, it is even more important to characterize the function of these  
377 newly formed adipocytes. Several studies showed a spatial and functional correlation between  
378 BMAT and active hematopoiesis suggesting that it is an important component of marrow niche  
379 supporting hematopoiesis. It has been recognized that proliferation and differentiation of  
380 myelopoietic cells in long term bone marrow cultures is supported by marrow adipocytes that  
381 provide necessary cytokines, among them IL6, and perhaps energy in the form of heat and fuel

382 (Gimble et al., 2006) (Robles et al., 2019) and several recent studies have linked marrow  
383 adipocyte support for hematopoiesis with production of stroma differentiation factor (SDF)  
384 (Naveiras et al., 2009; Zhou et al., 2017). These, together with our circumstantial evidence of  
385 BMAT expansion after reconstitution of gut microbiome, provide preliminary clues on signaling  
386 axes and BMAT function in the context of holobiont, which need to be explored further.

387 The molecular mechanism that we have traced to the butyrate-mediated GH/Igf1 signaling  
388 pathway is recognized, however, it is significant to note that by virtue of employing the  
389 deconstruction of the holobiont in GF rats and reconstruction of the holobiont in GFC rats, our  
390 work here has provided a critical insight into the rapid nature of the physiologic interaction  
391 between bone and microbiota which leads to rapid bone accrual. Thus, our work defines  
392 microbiota as a factor to consider in targeting adolescent bone disorders and clinical  
393 management of age-related bone loss.

## 394 **Materials and Methods**

### 395 **Animals**

396 All animal experiments were conducted according to the University of Toledo Institutional  
397 Animal Care and Use Committee approved protocols. This study was conducted using male, 7-  
398 week-old Sprague Dawley (SD) rats that were concomitantly raised as gnotobiotic rats until the  
399 commencement of the study. Gnotobiotic rats were separated into two groups, either germ-free  
400 (GF) (n=6/group) or germ-free conventionalized (GFC) (n=6/group). These animals were raised  
401 and set up for studies at Taconic Biosciences (<https://www.taconic.com/>). Conventionalization of  
402 GFC rats were performed by co-housing GF rats with conventionally-raised SD rats for 10 days  
403 (1:1 ratio). Upon arrival at the University of Toledo, the animals were immediately used for

404 experiments. The animals were overdosed with isoflurane anesthesia and blood and tissue were  
405 collected and stored for further use.

#### 406 **Collection and processing of specimens**

407 Femurs and tibiae extracted from sacrificed animals were thoroughly cleaned of muscle tissue.  
408 Both tibiae from each animal were immediately preserved in 10% NBF for subsequent  
409 evaluation of bone microstructure and for preparation of histological sections. For RNA  
410 isolations from bone and marrow single femur was kept on ice after extraction and processed as  
411 follows. Proximal and distal ends were cut off using rotary diamond micro saw, diaphysis bone  
412 sections were suspended in a hole drilled in microtube lid, and then bone and marrow were  
413 separated by centrifugation at 2000 x g for 1 min at 4°C. Following separation bone and marrow  
414 were flash frozen in liquid nitrogen. Tibiae intended for preparation of histological sections were  
415 kept in 10% NBF for 3 days, then decalcified on a rocking platform with Formical-4 reagent  
416 (StatLab, McKinney, TX, USA) in 3 consecutive extractions lasting 24, 6, and 2 hours using 20  
417 ml of the decalcifier. Oxalic acid test was conducted on the last fraction to ensure the complete  
418 calcium removal and decalcified bones were stored in 10% NBF for further processing.  
419 Cecal SCFAs were analyzed as described (Singh et al., 2018).

#### 420 **Bone morphometry**

421 Assessment of trabecular bone in proximal tibia and cortical bone at tibia midshaft was  
422 conducted by micro CT using  $\mu$ CT 35 system (Scanco Medical AG, Bruettisellen, Switzerland).  
423 Bone scans were performed with the x-ray source operating at 70 kVp and 114  $\mu$ A energy  
424 settings, and recording 500 projections/180° acquired at 300 ms integration time using 20  $\mu$ m  
425 nominal resolution voxel for both bone locations. Scans of the proximal tibia consisted of 340

426 cross-sectional slices starting at the top of growth plate, and images of trabecular bone were  
427 segmented at optimized lower threshold value of 220 using per mille scale (approximately 3000  
428 HU, or  $\mu$  of 1.76) following manual contouring starting 10 slices down from the intercondylar  
429 notch and extending for 200 more slices. Scans of the cortical bone at tibia midshaft contained  
430 57 slices all of which were contoured automatically, and which were segmented at 260 per mille  
431 threshold. Computed bone bending strength ( $I_{\max}/C_{\max}$  and  $I_{\min}/C_{\min}$ ) and torsional strength  
432 (pMOI) at tibia midshaft were based on bone cross-sectional geometry in combination with local  
433 tissue mineral content. The analysis of the trabecular bone microstructure, cortical bone  
434 parameters, and bone strength, was conducted using Evaluation Program V6.5-3 (Scanco  
435 Medical AG) and conformed to recommended guidelines (Bouxsein et al., 2010)

#### 436 **Gene expression**

437 Total RNAs from bone tissue and marrow specimens were isolated using TRI Reagent (MRC  
438 Inc., Cincinnati, OH, USA) following manufacturers' protocol. Frozen marrow and bone were  
439 directly homogenized in TRI Reagent using microtube pistons and rotor-stator homogenizer,  
440 respectively. cDNAs were synthesized using 0.25  $\mu$ g of isolated RNAs and Verso cDNA  
441 Synthesis Kit (Thermo Fisher Scientific, Waltham, MA, USA). Oligonucleotide primers for  
442 real-time qPCR were designed using Primer-Blast (NCBI, NIH) with PCR product length set  
443 from 80 to 120 nucleotides and 60° C optimal primer melting temperature. Oligonucleotides  
444 were synthesized by the Integrated DNA Technologies, Inc. (Coralville, IA, USA) and melting  
445 temperatures, adjusted for qPCR conditions, were calculated using OligoAnalyzer Tool available  
446 at the manufacturer's website. Oligonucleotide sequences, amplicon sizes, and melting  
447 temperatures are listed in the Supplementary Table 1. qPCR amplifications were carried out  
448 using TruAmp qPCR SYBR Green SuperMix-Rox (Smart Bioscience Inc., Maumee, OH, USA)



449 and StepOne Plus system (Applied Biosystems Inc., Foster City, CA, USA). Amplifications were  
450 carried out using 40 cycle two-step amplification protocol with annealing temperatures set to 4-5  
451 degrees below calculated primers melting temperatures, and finished with melting curve cycle to  
452 verify homogeneity of amplification products. Relative gene expression was analyzed by the  
453 comparative  $\Delta\Delta CT$  method using *18S* RNA levels for normalization.

#### 454 **Histology and image quantification**

455 Decalcified femur bones were segmented at tibia crest and tibiofibular junction, and resulting  
456 proximal and mid diaphysis fragments were embedded in paraffin blocks and processed at the  
457 University of Toledo Histology Core Facility. High resolution images of longitudinal 6  $\mu\text{m}$   
458 sections stained with H&E were generated using Olympus VS120 slide scanner. Images in the  
459 native VSI format were converted to TIFF images at the resolution of 0.685  $\mu\text{m}/\text{pixel}$  which  
460 were then used for histological analysis. Image conversion and subsequent measurements of  
461 circumferential lamellar bone, growth plate, and marrow adiposity were conducted using tools  
462 available in Fiji-ImageJ image processing package (Schindelin et al., 2012) equipped with  
463 OlympusViewer Plugin (Olympus Corp., Tokyo, Japan). Determination of adipocyte count and  
464 cell size distribution in bone marrow was done on 8-bit grayscale images after applying  
465 grayscale threshold of 210-254 which effectively separated adipocytes from the majority of bone  
466 marrow cellular components (histogram peak). Since bone marrow adipocytes significantly  
467 differ in size, 3 random bone marrow 0.3  $\text{mm}^2$  areas were sampled and it was determined that  
468 histologically relevant single adipocyte area was within the range of 90-1400  $\mu\text{m}^2$ . In order to  
469 eliminate irregular objects of similar areas roundness threshold was set to 0.4, which was  
470 equivalent to a 2.5 aspect ratio.

471 **Serum chemistry**

472 GF and GFC rats were euthanized by CO<sub>2</sub> asphyxiation and blood was collected *via* cardiac  
473 puncture during euthanasia in BD microtainer (Becton, Dickinson, Franklin Lakes, NJ).  
474 Hemolysis-free sera were obtained after centrifugation 10,000 rpm, 10 min, 4°C and stored at -  
475 80°C until further use. Automated assessment of serum markers was conducted using VetScan 2  
476 analyzer (Abaxis, Inc., Union City, CA, USA) and Comprehensive Diagnostic Profile rotor  
477 (Abaxis 500-7123) which contains tests for alanine aminotransferase (ALT), albumin (ALB),  
478 alkaline phosphatase (ALP), amylase (AMY), total calcium (C<sup>++</sup>), creatinine (CRE), globulin  
479 (GLOB), glucose (GLU), phosphorus (PHOS), potassium (K<sup>+</sup>), sodium (Na<sup>+</sup>), total bilirubin  
480 (TBIL), total protein (TP), and blood urea nitrogen (BUN). Serum preparation and measurements  
481 were conducted according to a protocol provided by the manufacturer.

482 **Statistical analysis**

483 Data are presented as means  $\pm$  SD. Statistical analysis was performed using two-tailed Student's  
484 test and Pearson correlation to compare animal groups using GraphPad Prism 8.3 (GraphPad, La  
485 Jolla, CA, USA). Statistical differences with  $p < 0.05$  were considered significant.

486

487 **Acknowledgements**

488 This work was supported by grants from the NIH to BJ and MVK (HL1430820 and CA219144,  
489 respectively), American Diabetes Association Innovative Basic Science Award (1-19-IBS-029)  
490 to BLC, and grant from the Crohn's and Colitis foundation to PS (Ref.# 522820)

491 Authors' roles: BJ, BLC, MVK, PJC contributed to experimental design, data analysis, and data  
492 interpretation; BSY, MVK PJC, RMG, SC, PS, BM conducted the experiments, PJC wrote the  
493 manuscript, BJ, BLC, MVK and PJC edited the manuscript, and take responsibility for the  
494 integrity of the data analysis.

495

496 **References**

- 497 Bouxsein, M. L., Boyd, S. K., Christiansen, B. A., Guldberg, R. E., Jepsen, K. J., & Muller, R.  
498 (2010). Guidelines for assessment of bone microstructure in rodents using micro-  
499 computed tomography. *J Bone Miner Res*, 25(7), 1468-1486. doi:10.1002/jbmr.141
- 500 Britton, R. A., Irwin, R., Quach, D., Schaefer, L., Zhang, J., Lee, T., . . . McCabe, L. R. (2014).  
501 Probiotic *L. reuteri* treatment prevents bone loss in a menopausal ovariectomized mouse  
502 model. *J Cell Physiol*, 229(11), 1822-1830. doi:10.1002/jcp.24636
- 503 Col, C., Dinler, K., Hasdemir, A. O., & Bugdayci, G. (2009). The effect of an intraperitoneal  
504 injection of melatonin on serum amylase levels in acute pancreatitis. *Jop*, 10(3), 306-309.
- 505 Cooper, E. S., Wellman, M. L., & Carsillo, M. E. (2009). Hyperalbuminemia associated with  
506 hepatocellular carcinoma in a dog. *Vet Clin Pathol*, 38(4), 516-520. doi:10.1111/j.1939-  
507 165X.2009.00153.x
- 508 Davis, C. D. (2016). The Gut Microbiome and Its Role in Obesity. *Nutr Today*, 51(4), 167-174.  
509 doi:10.1097/nt.0000000000000167
- 510 Frost, H. M. (1987). Bone "mass" and the "mechanostat": a proposal. *Anat Rec*, 219(1), 1-9.  
511 doi:10.1002/ar.1092190104
- 512 Frost, H. M. (1996). Perspectives: a proposed general model of the "mechanostat" (suggestions  
513 from a new skeletal-biologic paradigm). *Anat Rec*, 244(2), 139-147.  
514 doi:10.1002/(sici)1097-0185(199602)244:2<139::aid-ar1>3.0.co;2-x
- 515 Frost, H. M. (2003). Bone's mechanostat: a 2003 update. *Anat Rec A Discov Mol Cell Evol Biol*,  
516 275(2), 1081-1101. doi:10.1002/ar.a.10119
- 517 Gimble, J. M., Zvonic, S., Floyd, Z. E., Kassem, M., & Nuttall, M. E. (2006). Playing with bone  
518 and fat. *Journal of Cellular Biochemistry*, 98(2), 251-266. doi:10.1002/jcb.20777
- 519 Gross, T. S., Srinivasan, S., Liu, C. C., Clemens, T. L., & Bain, S. D. (2002). Noninvasive  
520 loading of the murine tibia: an in vivo model for the study of mechanotransduction. *J*  
521 *Bone Miner Res*, 17(3), 493-501. doi:10.1359/jbmr.2002.17.3.493
- 522 Guntur, A. R., & Rosen, C. J. (2013). IGF-1 regulation of key signaling pathways in bone.  
523 *Bonekey Rep*, 2, 437. doi:10.1038/bonekey.2013.171

- 524 Gurung, M., Li, Z., You, H., Rodrigues, R., Jump, D. B., Morgun, A., & Shulzhenko, N. (2020).  
525 Role of gut microbiota in type 2 diabetes pathophysiology. *EBioMedicine*, *51*, 102590.  
526 doi:10.1016/j.ebiom.2019.11.051
- 527 Hansson, L. I., Menander-Sellman, K., Stenstrom, A., & Thorngren, K. G. (1972). Rate of  
528 normal longitudinal bone growth in the rat. *Calcif Tissue Res*, *10*(3), 238-251.  
529 doi:10.1007/bf02012553
- 530 Hermanussen, M., Rol de Lama, M. A., JA, F. T., Grasedyck, L., & Burmeister, J. (1998). Short-  
531 term growth: evidence for chaotic series of mini growth spurts in rat growth. *Physiol*  
532 *Behav*, *64*(1), 7-13. doi:10.1016/s0031-9384(98)00023-7
- 533 Hernandez, C. J., Guss, J. D., Luna, M., & Goldring, S. R. (2016). Links Between the  
534 Microbiome and Bone. *J Bone Miner Res*, *31*(9), 1638-1646. doi:10.1002/jbmr.2887
- 535 Horowitz, M. C., Berry, R., Holtrup, B., Sebo, Z., Nelson, T., Fretz, J. A., . . . Rosen, C. J.  
536 (2017). Bone marrow adipocytes. *Adipocyte*, *6*(3), 193-204.  
537 doi:10.1080/21623945.2017.1367881
- 538 Iwaniec, U. T., & Turner, R. T. (2016). Influence of body weight on bone mass, architecture and  
539 turnover. *J Endocrinol*, *230*(3), R115-130. doi:10.1530/joe-16-0089
- 540 Kang, B. H., Kim, S. H., Jung, K. A., Kim, S. Y., Chung, S. H., Park, Y. S., . . . Shim, K. S.  
541 (2015). Comparison of growth and pubertal progression in wild type female rats with  
542 different bedding types. *Ann Pediatr Endocrinol Metab*, *20*(1), 53-58.  
543 doi:10.6065/apem.2015.20.1.53
- 544 Lazarenko, O. P., Rzonca, S. O., Hogue, W. R., Swain, F. L., Suva, L. J., & Lecka-Czernik, B.  
545 (2007). Rosiglitazone induces decreases in bone mass and strength that are reminiscent of  
546 aged bone. *Endocrinology*, *148*(6), 2669-2680. doi:10.1210/en.2006-1587
- 547 Lecka-Czernik, B., Gubrij, I., Moerman, E. J., Kajkenova, O., Lipschitz, D. A., Manolagas, S.  
548 C., & Jilka, R. L. (1999). Inhibition of *Osf2/Cbfa1* expression and terminal osteoblast  
549 differentiation by PPARgamma2. *J Cell Biochem*, *74*(3), 357-371.
- 550 Lecka-Czernik, B., & Stechschulte, L. A. (2014). Bone and fat: A relationship of different  
551 shades. *Archives of Biochemistry and Biophysics*, *561*, 124-129.  
552 doi:<https://doi.org/10.1016/j.abb.2014.06.010>
- 553 Lecka-Czernik, B., Stechschulte, L. A., Czernik, P. J., Sherman, S. B., Huang, S., & Krings, A.  
554 (2017). Marrow Adipose Tissue: Skeletal Location, Sexual Dimorphism, and Response to

- 555 Sex Steroid Deficiency. *Frontiers in Endocrinology*, 8(188).  
556 doi:10.3389/fendo.2017.00188
- 557 Li, J. Y., Chassaing, B., Tyagi, A. M., Vaccaro, C., Luo, T., Adams, J., . . . Pacifici, R. (2016).  
558 Sex steroid deficiency-associated bone loss is microbiota dependent and prevented by  
559 probiotics. *J Clin Invest*, 126(6), 2049-2063. doi:10.1172/jci86062
- 560 Li, Y., Meng, Y., & Yu, X. (2019). The Unique Metabolic Characteristics of Bone Marrow  
561 Adipose Tissue. *Front Endocrinol (Lausanne)*, 10, 69. doi:10.3389/fendo.2019.00069
- 562 Li, Z., Hardij, J., Bagchi, D. P., Scheller, E. L., & MacDougald, O. A. (2018). Development,  
563 regulation, metabolism and function of bone marrow adipose tissues. *Bone*, 110, 134-140.  
564 doi:10.1016/j.bone.2018.01.008
- 565 Lillie, L. E., Temple, N. J., & Florence, L. Z. (1996). Reference values for young normal  
566 Sprague-Dawley rats: weight gain, hematology and clinical chemistry. *Hum Exp Toxicol*,  
567 15(8), 612-616. doi:10.1177/096032719601500802
- 568 Lindsey, R. C., & Mohan, S. (2016). Skeletal effects of growth hormone and insulin-like growth  
569 factor-I therapy. *Mol Cell Endocrinol*, 432, 44-55. doi:10.1016/j.mce.2015.09.017
- 570 Lucas, S., Omata, Y., Hofmann, J., Bottcher, M., Iljazovic, A., Sarter, K., . . . Zaiss, M. M.  
571 (2018). Short-chain fatty acids regulate systemic bone mass and protect from pathological  
572 bone loss. *Nat Commun*, 9(1), 55. doi:10.1038/s41467-017-02490-4
- 573 Margulis, L., & Fester, R. (1991). *Symbiosis as a source of evolutionary innovation : speciation*  
574 *and morphogenesis*: Cambridge (Mass.) : MIT press.
- 575 Medicine, N. L. o. (2020). Clinical trials. Retrieved from <https://clinicaltrials.gov/>
- 576 Menagh, P. J., Turner, R. T., Jump, D. B., Wong, C. P., Lowry, M. B., Yakar, S., . . . Iwaniec, U.  
577 T. (2010). Growth hormone regulates the balance between bone formation and bone  
578 marrow adiposity. *J Bone Miner Res*, 25(4), 757-768. doi:10.1359/jbmr.091015
- 579 Miletta, M. C., Petkovic, V., Eble, A., Ammann, R. A., Fluck, C. E., & Mullis, P. E. (2014).  
580 Butyrate increases intracellular calcium levels and enhances growth hormone release  
581 from rat anterior pituitary cells via the G-protein-coupled receptors GPR41 and 43. *PLoS*  
582 *One*, 9(10), e107388. doi:10.1371/journal.pone.0107388
- 583 Moore, S. G., & Dawson, K. L. (1990). Red and yellow marrow in the femur: age-related  
584 changes in appearance at MR imaging. *Radiology*, 175(1), 219-223.  
585 doi:10.1148/radiology.175.1.2315484

- 586 Mutlu, E. A., Keshavarzian, A., & Mutlu, G. M. (2006). Hyperalbuminemia and elevated  
587 transaminases associated with high-protein diet. *Scand J Gastroenterol*, *41*(6), 759-760.  
588 doi:10.1080/00365520500442625
- 589 Naveiras, O., Nardi, V., Wenzel, P. L., Hauschka, P. V., Fahey, F., & Daley, G. Q. (2009). Bone-  
590 marrow adipocytes as negative regulators of the haematopoietic microenvironment.  
591 *Nature*, *460*(7252), 259-263. doi:10.1038/nature08099
- 592 Pacifici, R. (2018). Bone Remodeling and the Microbiome. *Cold Spring Harb Perspect Med*,  
593 *8*(4). doi:10.1101/cshperspect.a031203
- 594 Park, O. J., Kim, J., Yang, J., Yun, C. H., & Han, S. H. (2017). Muramyl Dipeptide, a Shared  
595 Structural Motif of Peptidoglycans, Is a Novel Inducer of Bone Formation through  
596 Induction of Runx2. *J Bone Miner Res*, *32*(7), 1455-1468. doi:10.1002/jbmr.3137
- 597 Rahman, M. M., Kukita, A., Kukita, T., Shobuike, T., Nakamura, T., & Kohashi, O. (2003). Two  
598 histone deacetylase inhibitors, trichostatin A and sodium butyrate, suppress  
599 differentiation into osteoclasts but not into macrophages. *Blood*, *101*(9), 3451-3459.  
600 doi:10.1182/blood-2002-08-2622
- 601 Reinecke, M., Schmid, A. C., Heyberger-Meyer, B., Hunziker, E. B., & Zapf, J. (2000). Effect of  
602 growth hormone and insulin-like growth factor I (IGF-I) on the expression of IGF-I  
603 messenger ribonucleic acid and peptide in rat tibial growth plate and articular  
604 chondrocytes in vivo. *Endocrinology*, *141*(8), 2847-2853. doi:10.1210/endo.141.8.7624
- 605 Repudi, S. R., Patra, M., & Sen, M. (2013). WISP3-IGF1 interaction regulates chondrocyte  
606 hypertrophy. *J Cell Sci*, *126*(Pt 7), 1650-1658. doi:10.1242/jcs.119859
- 607 Roach, H. I., Mehta, G., Oreffo, R. O., Clarke, N. M., & Cooper, C. (2003). Temporal analysis of  
608 rat growth plates: cessation of growth with age despite presence of a physis. *J Histochem*  
609 *Cytochem*, *51*(3), 373-383. doi:10.1177/002215540305100312
- 610 Robles, H., Park, S., Joens, M. S., Fitzpatrick, J. A. J., Craft, C. S., & Scheller, E. L. (2019).  
611 Characterization of the bone marrow adipocyte niche with three-dimensional electron  
612 microscopy. *Bone*, *118*, 89-98. doi:10.1016/j.bone.2018.01.020
- 613 Scheller, E. L., Doucette, C. R., Learman, B. S., Cawthorn, W. P., Khandaker, S., Schell, B., . . .  
614 MacDougald, O. A. (2015). Region-specific variation in the properties of skeletal  
615 adipocytes reveals regulated and constitutive marrow adipose tissues. *Nature*  
616 *Communications*, *6*(1), 7808. doi:10.1038/ncomms8808

- 617 Schepper, J. D., Irwin, R., Kang, J., Dagenais, K., Lemon, T., Shinouskis, A., . . . McCabe, L. R.  
618 (2017). Probiotics in Gut-Bone Signaling. *Adv Exp Med Biol*, *1033*, 225-247.  
619 doi:10.1007/978-3-319-66653-2\_11
- 620 Schindelin, J., Arganda-Carreras, I., Frise, E., Kaynig, V., Longair, M., Pietzsch, T., . . .  
621 Cardona, A. (2012). Fiji: an open-source platform for biological-image analysis. *Nat*  
622 *Methods*, *9*(7), 676-682. doi:10.1038/nmeth.2019
- 623 Sender, R., Fuchs, S., & Milo, R. (2016). Revised Estimates for the Number of Human and  
624 Bacteria Cells in the Body. *PLoS Biol*, *14*(8), e1002533.  
625 doi:10.1371/journal.pbio.1002533
- 626 Sheng, M. H., Zhou, X. D., Bonewald, L. F., Baylink, D. J., & Lau, K. H. (2013). Disruption of  
627 the insulin-like growth factor-1 gene in osteocytes impairs developmental bone growth in  
628 mice. *Bone*, *52*(1), 133-144. doi:10.1016/j.bone.2012.09.027
- 629 Silva, Y. P., Bernardi, A., & Frozza, R. L. (2020). The Role of Short-Chain Fatty Acids From  
630 Gut Microbiota in Gut-Brain Communication. *Front Endocrinol (Lausanne)*, *11*, 25.  
631 doi:10.3389/fendo.2020.00025
- 632 Simon, J.-C., Marchesi, J. R., Mougel, C., & Selosse, M.-A. (2019). Host-microbiota  
633 interactions: from holobiont theory to analysis. *Microbiome*, *7*(1), 5. doi:10.1186/s40168-  
634 019-0619-4
- 635 Singh, V., Yeoh, B. S., Chassaing, B., Xiao, X., Saha, P., Aguilera Olvera, R., . . . Vijay-Kumar,  
636 M. (2018). Dysregulated Microbial Fermentation of Soluble Fiber Induces Cholestatic  
637 Liver Cancer. *Cell*, *175*(3), 679-694.e622. doi:10.1016/j.cell.2018.09.004
- 638 Sjögren, K., Engdahl, C., Henning, P., Lerner, U. H., Tremaroli, V., Lagerquist, M. K., . . .  
639 Ohlsson, C. (2012). The gut microbiota regulates bone mass in mice. *J Bone Miner Res*,  
640 *27*(6), 1357-1367. doi:10.1002/jbmr.1588
- 641 Stenstrom, A., Hansson, L. I., & Thorngren, K. G. (1977). Cortical bone remodeling in normal  
642 rat. *Calcif Tissue Res*, *23*(2), 161-170. doi:10.1007/bf02012782
- 643 Stratikopoulos, E., Szabolcs, M., Dragatsis, I., Klinakis, A., & Efstratiadis, A. (2008). The  
644 hormonal action of IGF1 in postnatal mouse growth. *Proc Natl Acad Sci U S A*, *105*(49),  
645 19378-19383. doi:10.1073/pnas.0809223105
- 646 Styne, D. M. (2003). The Regulation of Pubertal Growth. *Hormone Research in Paediatrics*,  
647 *60*(suppl 1)(Suppl. 1), 22-26. doi:10.1159/000071222



- 648 Tahimic, C. G., Wang, Y., & Bikle, D. D. (2013). Anabolic effects of IGF-1 signaling on the  
649 skeleton. *Front Endocrinol (Lausanne)*, 4, 6. doi:10.3389/fendo.2013.00006
- 650 Tam, C. S., Harrison, J. E., Reed, R., & Cruickshank, B. (1978). Bone apposition rate as an index  
651 of bone metabolism. *Metabolism*, 27(2), 143-150. doi:10.1016/0026-0495(78)90160-9
- 652 Tugnoli, B., Bernardini, C., Forni, M., Piva, A., Stahl, C. H., & Grilli, E. (2019). Butyric acid  
653 induces spontaneous adipocytic differentiation of porcine bone marrow-derived  
654 mesenchymal stem cells. *In Vitro Cell Dev Biol Anim*, 55(1), 17-24. doi:10.1007/s11626-  
655 018-0307-x
- 656 Tyagi, A. M., Yu, M., Darby, T. M., Vaccaro, C., Li, J. Y., Owens, J. A., . . . Pacifici, R. (2018).  
657 The Microbial Metabolite Butyrate Stimulates Bone Formation via T Regulatory Cell-  
658 Mediated Regulation of WNT10B Expression. *Immunity*, 49(6), 1116-1131.e1117.  
659 doi:10.1016/j.immuni.2018.10.013
- 660 Walker, H. K., Hall, W. D., & Hurst, J. W. (1990). *Clinical methods : the history, physical, and*  
661 *laboratory examinations*. Boston: Butterworths.
- 662 Wang, J., Zhou, J., & Bondy, C. A. (1999). Igf1 promotes longitudinal bone growth by insulin-  
663 like actions augmenting chondrocyte hypertrophy. *Faseb j*, 13(14), 1985-1990.  
664 doi:10.1096/fasebj.13.14.1985
- 665 Wang, Y., Bikle, D. D., & Chang, W. (2013). Autocrine and Paracrine Actions of IGF-I  
666 Signaling in Skeletal Development. *Bone Res*, 1(3), 249-259. doi:10.4248/br201303003
- 667 Weingarden, A. R., & Vaughn, B. P. (2017). Intestinal microbiota, fecal microbiota  
668 transplantation, and inflammatory bowel disease. *Gut Microbes*, 8(3), 238-252.  
669 doi:10.1080/19490976.2017.1290757
- 670 Xiao, E., He, L., Wu, Q., Li, J., He, Y., Zhao, L., . . . Zhang, Y. (2017). Microbiota regulates  
671 bone marrow mesenchymal stem cell lineage differentiation and immunomodulation.  
672 *Stem Cell Res Ther*, 8(1), 213. doi:10.1186/s13287-017-0670-7
- 673 Xu, X., Jia, X., Mo, L., Liu, C., Zheng, L., Yuan, Q., & Zhou, X. (2017). Intestinal microbiota: a  
674 potential target for the treatment of postmenopausal osteoporosis. *Bone Res*, 5, 17046.  
675 doi:10.1038/boneres.2017.46
- 676 Yakar, S., Canalis, E., Sun, H., Mejia, W., Kawashima, Y., Nasser, P., . . . Rosen, C. (2009).  
677 Serum IGF-1 determines skeletal strength by regulating subperiosteal expansion and trait

678 interactions. *Journal of Bone and Mineral Research*, 24, 1481-1492.  
679 doi:10.1359/jbmr.090226

680 Yakar, S., Rosen, C. J., Beamer, W. G., Ackert-Bicknell, C. L., Wu, Y., Liu, J. L., . . . LeRoith,  
681 D. (2002). Circulating levels of IGF-1 directly regulate bone growth and density. *J Clin*  
682 *Invest*, 110(6), 771-781. doi:10.1172/jci15463

683 Yan, J., & Charles, J. F. (2017). Gut Microbiome and Bone: to Build, Destroy, or Both? *Curr*  
684 *Osteoporos Rep*, 15(4), 376-384. doi:10.1007/s11914-017-0382-z

685 Yan, J., Herzog, J. W., Tsang, K., Brennan, C. A., Bower, M. A., Garrett, W. S., . . . Charles, J.  
686 F. (2016). Gut microbiota induce IGF-1 and promote bone formation and growth. *Proc*  
687 *Natl Acad Sci U S A*, 113(47), E7554-e7563. doi:10.1073/pnas.1607235113

688 Zaias, J., Mineau, M., Cray, C., Yoon, D., & Altman, N. H. (2009). Reference values for serum  
689 proteins of common laboratory rodent strains. *J Am Assoc Lab Anim Sci*, 48(4), 387-390.

690 Zhou, B. O., Yu, H., Yue, R., Zhao, Z., Rios, J. J., Naveiras, O., & Morrison, S. J. (2017). Bone  
691 marrow adipocytes promote the regeneration of stem cells and haematopoiesis by  
692 secreting SCF. *Nat Cell Biol*, 19(8), 891-903. doi:10.1038/ncb3570

693
